# Supplementary material for: Direct Z-Scheme g-C3N5/Cu3TiO4 Heterojunction Enhanced Photocatalytic Performance of Chromene-3-Carbonitriles Synthesis under Visible Light Irradiation
Source: MDPI journal article supplement (doi:10.3390/catal12121593), 2022-12-06
Supplement: s1 [file s1]

# Direct Z-Scheme g-C<sub>3</sub>N<sub>5</sub>/Cu<sub>3</sub>TiO<sub>4</sub> Heterojunction Enhanced Photocatalytic Performance of Chromene-3-Carbonitriles Synthesis under Visible Light Irradiation

Murugan Arunachalapandi, Thangapandi Chellapandi, Gunabalan Madhumitha, Ravichandran Manjupriya, Kumar Aravindraj and Selvaraj Mohana Roopan \*

Chemistry of Heterocycles & Natural Product Research Laboratory, Department of Chemistry, School of Advanced Sciences, Vellore Institute of Technology, Vellore 632 014, Tamil Nadu, India; arunachalapandi.m2017@vitstudent.ac.in (M.A.); chellapandi.t@vit.ac.in (T.C.); madhumitha.g@vit.ac.in (G.M.); r.manjupriya@vit.ac.in (R.M.); aravindraj.k@vit.ac.in (K.A.)

\* Correspondence: mohanaroopan.s@vit.ac.in; Tel.: 0416-220-2313

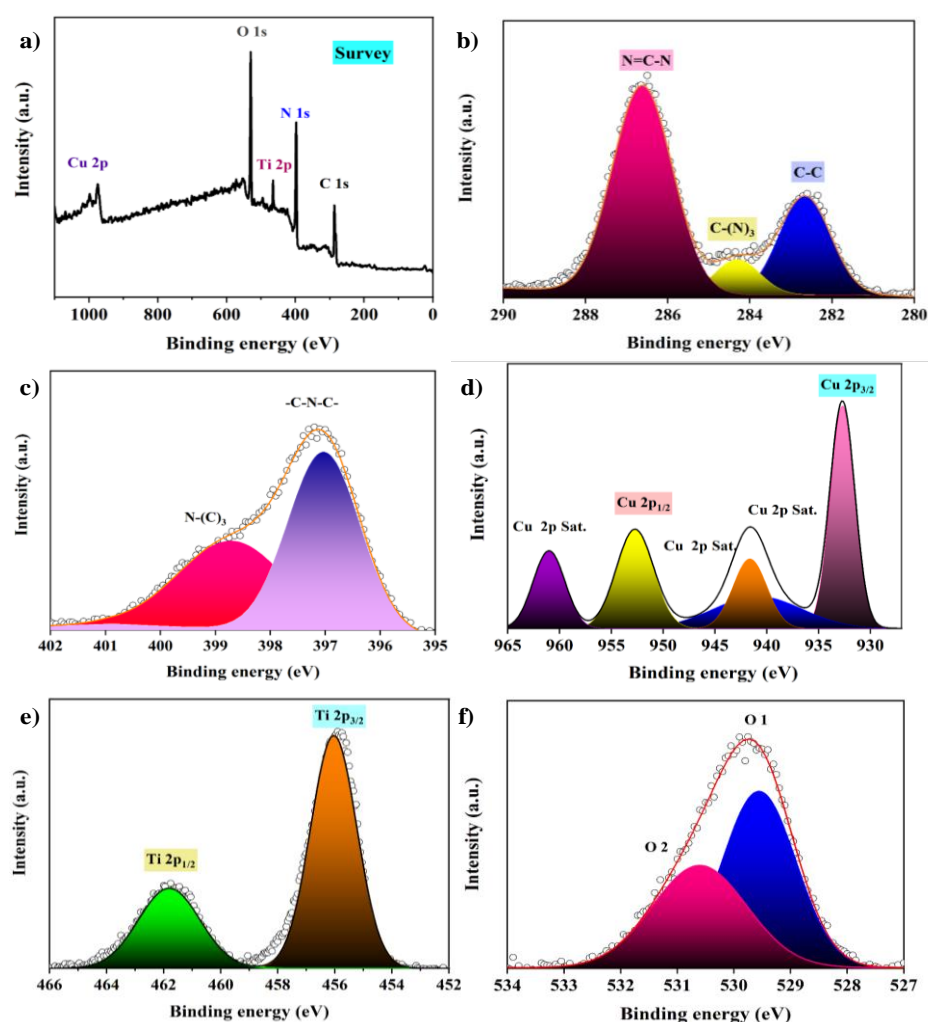

**Figure S1.** XPS analysis of 10% CN5CT nanocomposite (a) Survey (b) C 1s (c) N 1s (d) Cu 2p (e) Ti2p & f) O 1s.

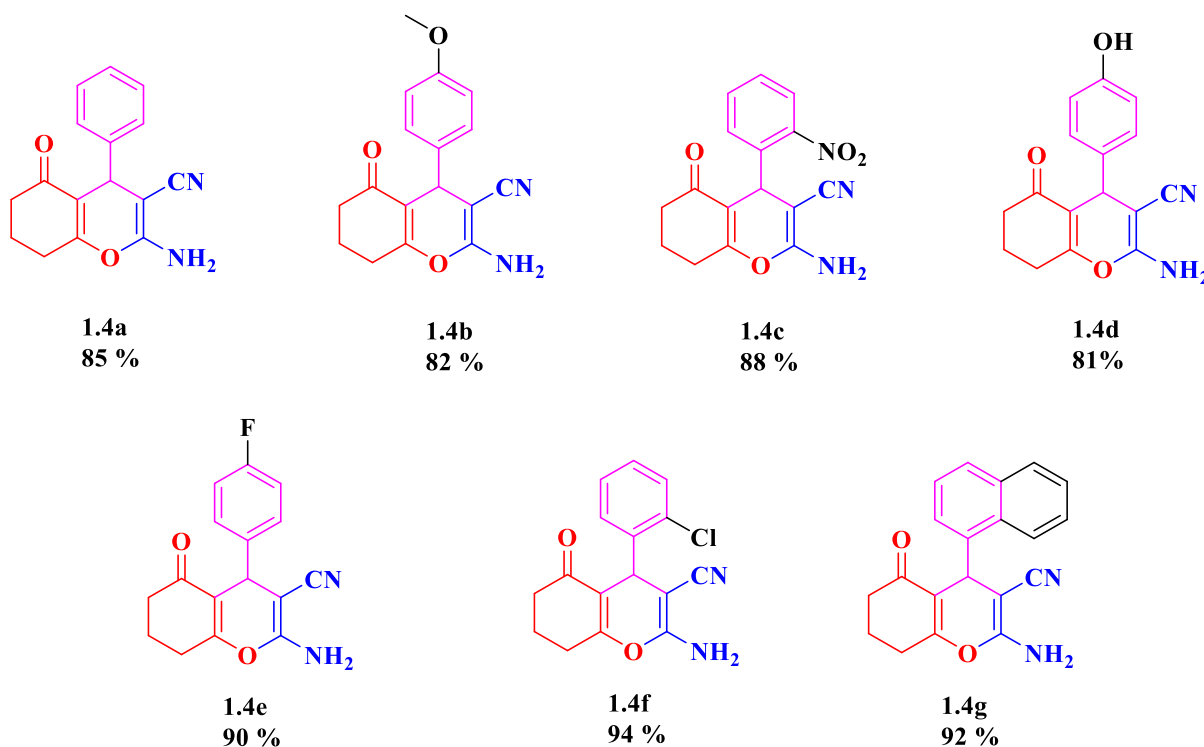

| 1.4a                                                                              | 2-amino-5-oxo-4-phenyl-5,6,7,8-tetrahydro-4H-chromene-3-carbonitrile                                                                     |  |
|-----------------------------------------------------------------------------------|------------------------------------------------------------------------------------------------------------------------------------------|--|
| Molecular Formula                                                                 | C <sub>16</sub> H <sub>14</sub> N <sub>2</sub> O <sub>2</sub>                                                                            |  |
| Molecular Weight (g/mol)                                                          | 267.10                                                                                                                                   |  |
| Colour                                                                            | white solid                                                                                                                              |  |
| Melting point (°C)                                                                | 206-208                                                                                                                                  |  |
| FT-IR, ν/cm <sup>-1</sup>                                                         | 3039, 1447, 1334, 968, 754, 703.                                                                                                         |  |
| <sup>1</sup> H-NMR (400 MHz, CDCl <sub>3</sub> , Me <sub>4</sub> Si)<br>(ppm): δ  | 1.91-2.04 (m, 2H), 2.28-2.37 (m, 2H), 2.65-2.68 (t, 2H), 4.24 (s, 1H), 7.05 (s, 2H), 7.20-7.24 (m, 3H), 7.32-7.35 (t, 2H).               |  |
| <sup>13</sup> C-NMR (100 MHz, CDCl <sub>3</sub> , Me <sub>4</sub> Si)<br>(ppm): δ | 20.20, 26.99, 36.05, 57.39, 113.21, 119.81, 124.11, 129.05, 146.73, 152.78, 159.01, 165.58, 196.33.                                      |  |
|                                                                                   | 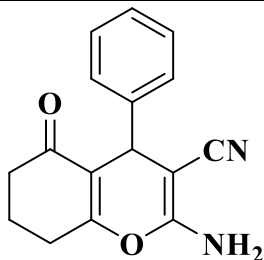                                                    |  |
| 1.4b                                                                              | 2-amino-4-(4-methoxyphenyl)-5-oxo-5,6,7,8-tetrahydro-4H-chromene-3-carbonitrile                                                          |  |
| Molecular Formula                                                                 | C <sub>17</sub> H <sub>16</sub> N <sub>2</sub> O <sub>3</sub>                                                                            |  |
| Molecular Weight (g/mol)                                                          | 297.11                                                                                                                                   |  |
| Colour                                                                            | Light white solid                                                                                                                        |  |
| Melting point (°C)                                                                | 236-238                                                                                                                                  |  |
| FT-IR, ν/cm <sup>-1</sup>                                                         | 3111, 1700, 1649, 1513, 1441, 1219, 1083, 777, 533.                                                                                      |  |
| <sup>1</sup> H-NMR (400 MHz, CDCl <sub>3</sub> , Me <sub>4</sub> Si)<br>(ppm): δ  | 1.91-1.96 (m, 2H), 2.22-2.30 (t, 2H), 2.50-2.56 (t, 2H), 3.59 (s, 3H), 4.31 (s, 1H), 4.48 (s, 2H), 6.74-6.76 (d, 2H), 7.08-7.10 (d, 2H). |  |
| <sup>13</sup> C-NMR (100 MHz, CDCl <sub>3</sub> , Me <sub>4</sub> Si)<br>(ppm): δ | 20.14, 27.01, 36.84, 55.24, 113.41, 113.97, 115.48, 118.77, 128.66, 128.95, 135.51, 157.35, 158.63, 162.97, 196.11.                      |  |
|                                                                                   |                                                     |  |
| 1.4c                                                                              | 2-amino-4-(2-nitrophenyl)-5-oxo-5,6,7,8-tetrahydro-4H-chromene-3-carbonitrile                                                            |  |

|                                                                                |                                                                                                                                               |                                                                                       |
|--------------------------------------------------------------------------------|-----------------------------------------------------------------------------------------------------------------------------------------------|---------------------------------------------------------------------------------------|
| Molecular Formula                                                              | C <sub>16</sub> H <sub>13</sub> N <sub>3</sub> O <sub>4</sub>                                                                                 | 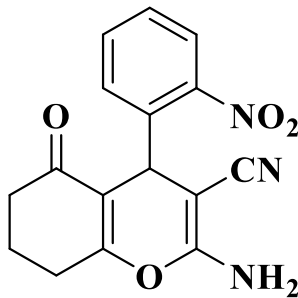   |
| Molecular Weight (g/mol)                                                       | 311.09                                                                                                                                        |                                                                                       |
| Colour                                                                         | white solid                                                                                                                                   |                                                                                       |
| Melting point (°C)                                                             | 232-234                                                                                                                                       |                                                                                       |
| FT-IR, ν/cm <sup>-1</sup>                                                      | 2059, 1520, 1448, 1334, 968, 831, 747.                                                                                                        |                                                                                       |
| <sup>1</sup> H-NMR (400 MHz, CDCl <sub>3</sub> , Me <sub>4</sub> Si) (ppm): δ  | 1.84-1.95 (m, 2H), 2.13-2.26 (m, 2H), 2.58-2.61 (t, 2H), 4.93 (s, 1H), 7.16 (s, 2H), 7.37-7.45 (m, 2H), 7.63-7.67 (t, 1H), 7.80-7.82 (d, 1H). |                                                                                       |
| <sup>13</sup> C-NMR (100 MHz, CDCl <sub>3</sub> , Me <sub>4</sub> Si) (ppm): δ | 20.18, 26.97, 36.05, 57.41, 113.21, 119.77, 122.94, 124.70, 129.01, 131.07, 146.72, 152.76, 159.01, 165.57, 196.33.                           |                                                                                       |
| 1.4d                                                                           | 2-amino-4-(4-hydroxyphenyl)-5-oxo-5,6,7,8-tetrahydro-4H-chromene-3-carbonitrile                                                               |                                                                                       |
| Molecular Formula                                                              | C <sub>16</sub> H <sub>14</sub> N <sub>2</sub> O <sub>3</sub>                                                                                 |   |
| Molecular Weight (g/mol)                                                       | 282.29                                                                                                                                        |                                                                                       |
| Colour                                                                         | Light white solid                                                                                                                             |                                                                                       |
| Melting point (°C)                                                             | 242-244                                                                                                                                       |                                                                                       |
| FT-IR, ν/cm <sup>-1</sup>                                                      | 3175, 1700, 1549, 1327, 1169, 1091, 1004, 818.                                                                                                |                                                                                       |
| <sup>1</sup> H-NMR (400 MHz, CDCl <sub>3</sub> , Me <sub>4</sub> Si) (ppm): δ  | 1.83-1.95 (m, 2H), 2.24-2.30 (m, 2H), 2.58-2.61 (t, 2H), 4.08 (s, 1H), 6.64-6.66 (d, 2H), 6.90 (s, 2H), 6.93-6.95 (d, 2H), 9.23 (s, 1H).      |                                                                                       |
| <sup>13</sup> C-NMR (100 MHz, CDCl <sub>3</sub> , Me <sub>4</sub> Si) (ppm): δ | 26.92, 35.03, 36.85, 59.16, 114.76, 115.46, 120.38, 128.58, 135.69, 156.46, 158.85, 164.44, 196.31.                                           |                                                                                       |
| 1.4e                                                                           | 2-amino-4-(4-fluorophenyl)-5-oxo-5,6,7,8-tetrahydro-4H-chromene-3-carbonitrile                                                                |                                                                                       |
| Molecular Formula                                                              | C <sub>16</sub> H <sub>13</sub> FN <sub>2</sub> O <sub>2</sub>                                                                                |  |
| Molecular Weight (g/mol)                                                       | 285.09                                                                                                                                        |                                                                                       |
| Colour                                                                         | Yellow solid                                                                                                                                  |                                                                                       |
| Melting point (°C)                                                             | 250-252                                                                                                                                       |                                                                                       |
| FT-IR, ν/cm <sup>-1</sup>                                                      | 3175, 1700, 1549, 1327, 1169, 1091, 1004, 818.                                                                                                |                                                                                       |
| <sup>1</sup> H-NMR (400 MHz, CDCl <sub>3</sub> , Me <sub>4</sub> Si) (ppm): δ  | 1.94-1.97 (m, 2H), 2.22-2.36 (t, 2H), 2.50-2.56 (t, 2H), 4.31 (s, 1H), 4.47 (s, 2H), 6.74-6.76 (d, 2H), 7.08-7.10 (d, 2H).                    |                                                                                       |
| <sup>13</sup> C-NMR (100 MHz, CDCl <sub>3</sub> , Me <sub>4</sub> Si) (ppm): δ | 20.24, 26.94, 35.27, 58.51, 114.13, 115.35, 120.13, 129.45, 129.53, 141.44, 158.92, 160.17, 162.58, 164.95, 196.31.                           |                                                                                       |
| 1.4f                                                                           | 2-amino-4-(2-chlorophenyl)-5-oxo-5,6,7,8-tetrahydro-4H-chromene-3-carbonitrile                                                                |                                                                                       |
| Molecular Formula                                                              | C <sub>16</sub> H <sub>13</sub> ClN <sub>2</sub> O <sub>2</sub>                                                                               |  |
| Molecular Weight (g/mol)                                                       | 300.74                                                                                                                                        |                                                                                       |
| Colour                                                                         | Light white solid                                                                                                                             |                                                                                       |
| Melting point (°C)                                                             | 222-224                                                                                                                                       |                                                                                       |
| FT-IR, ν/cm <sup>-1</sup>                                                      | 3069, 1677, 1420, 1283, 1083, 854, 747.                                                                                                       |                                                                                       |
| <sup>1</sup> H-NMR (400 MHz, CDCl <sub>3</sub> , Me <sub>4</sub> Si) (ppm): δ  | 1.91-1.98 (m, 2H), 2.22-2.30 (t, 2H), 2.60-2.63 (t, 2H), 4.70 (s, 1H), 7.01 (s, 3H), 6.72-6.78 (d, 2H), 7.09-7.21 (d, 3H).                    |                                                                                       |

|                                                                                                               |                                                                                                                                                                                                                           |
|---------------------------------------------------------------------------------------------------------------|---------------------------------------------------------------------------------------------------------------------------------------------------------------------------------------------------------------------------|
| <b>1.4g</b>                                                                                                   | <b>2-amino-4-(naphthalen-1-yl)-5-oxo-5,6,7,8-tetrahydro-4H-chromene-3-carbonitrile</b>                                                                                                                                    |
| <b>Molecular Formula</b>                                                                                      | $C_{20}H_{16}N_2O_2$                                                                                                                                                                                                      |
| <b>Molecular Weight (g/mol)</b>                                                                               | 316.12                                                                                                                                                                                                                    |
| <b>Colour</b>                                                                                                 | Light white solid                                                                                                                                                                                                         |
| <b>Melting point (°C)</b>                                                                                     | 264-266                                                                                                                                                                                                                   |
| <b>FT-IR, <math>\nu/cm^{-1}</math></b>                                                                        | 3326, 1677, 1574, 1441, 1161, 1105, 697.                                                                                                                                                                                  |
| <b><math>^1H</math>-NMR (400 MHz, <math>CDCl_3</math>, <math>Me_4Si</math>) (ppm): <math>\delta</math></b>    | 1.85-1.98 (m, 2H), 2.08-2.31 (m, 2H), 2.53-2.66 (m, 2H), 4.45 (s, 1H), 4.52 (s, 2H), 7.14-7.16 (d, 1H), 7.29-7.33 (t, 1H), 7.39-7.42 (t, 1H), 7.48-7.52 (d, 1H), 7.63-7.65 (t, 1H), 7.73-7.74 (d, 1H), 8.32-8.34 (d, 1H). |
| <b><math>^{13}C</math>-NMR (100 MHz, <math>CDCl_3</math>, <math>Me_4Si</math>) (ppm): <math>\delta</math></b> | 20.23, 27.07, 36.75, 115.85, 123.34, 125.35, 126.31, 127.95, 128.67, 157.30, 163.66, 196.0.                                                                                                                               |
| <b><math>^{13}C</math>-NMR (100 MHz, <math>CDCl_3</math>, <math>Me_4Si</math>) (ppm): <math>\delta</math></b> | 20.16, 27.60, 34.35, 37.12, 40.11, 111.61, 112.58, 112.66, 128.25, 128.56, 133.81, 148.52, 158.15.                                                                                                                        |

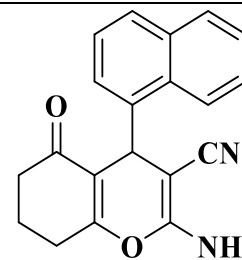

Signature SIF VIT VELLORE  
PD-benz

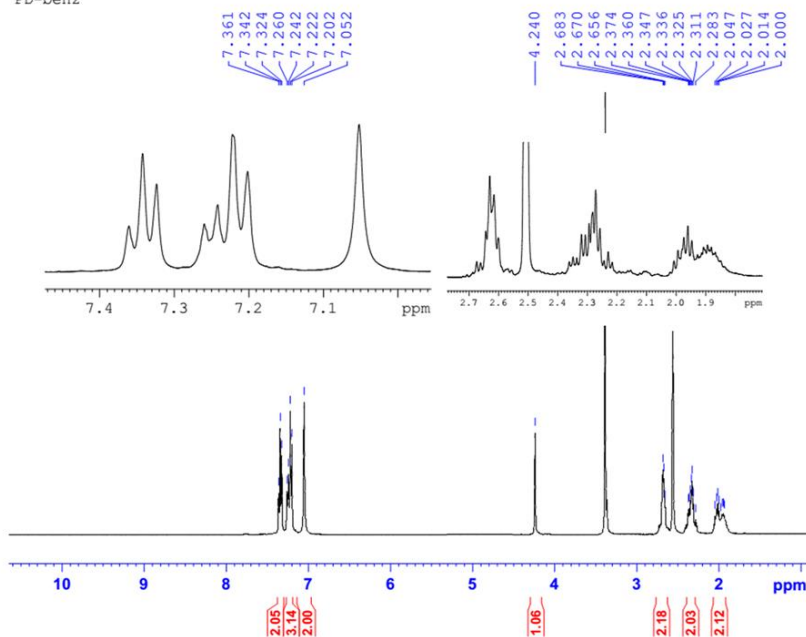

**BRUKER**

Current Data Parameters  
NAME Dr.MOO150422  
EXPNO 10  
PROCNO 1

F2 - Acquisition Parameters  
Date\_ 20220415  
Time\_ 17.05 h  
INSTRUM spect  
PROBHD z108618\_0505 (zq30)  
PULPROG zg30  
TD 65536  
SOLVENT DMSO  
NS 32  
DS 2  
SWH 8012.820 Hz  
FIDRES 0.244532 Hz  
AQ 4.0894465 sec  
RG 175.97  
DW 62.400 usec  
DE 6.50 usec  
TE 297.5 K  
D1 1.00000000 sec  
TDO 1  
SFO1 400.2604716 MHz  
NUC1 1H  
P1 14.07 usec  
PLW1 16.00000000 W

F2 - Processing parameters  
SI 65536  
SF 400.2579782 MHz  
WDW EM  
SSB 0  
LB 0.30 Hz  
GB 0  
PC 1.00

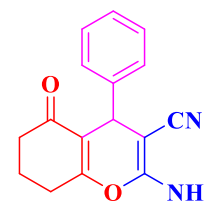

Figure S2.  $^1H$  NMR spectrum of 1.4a.

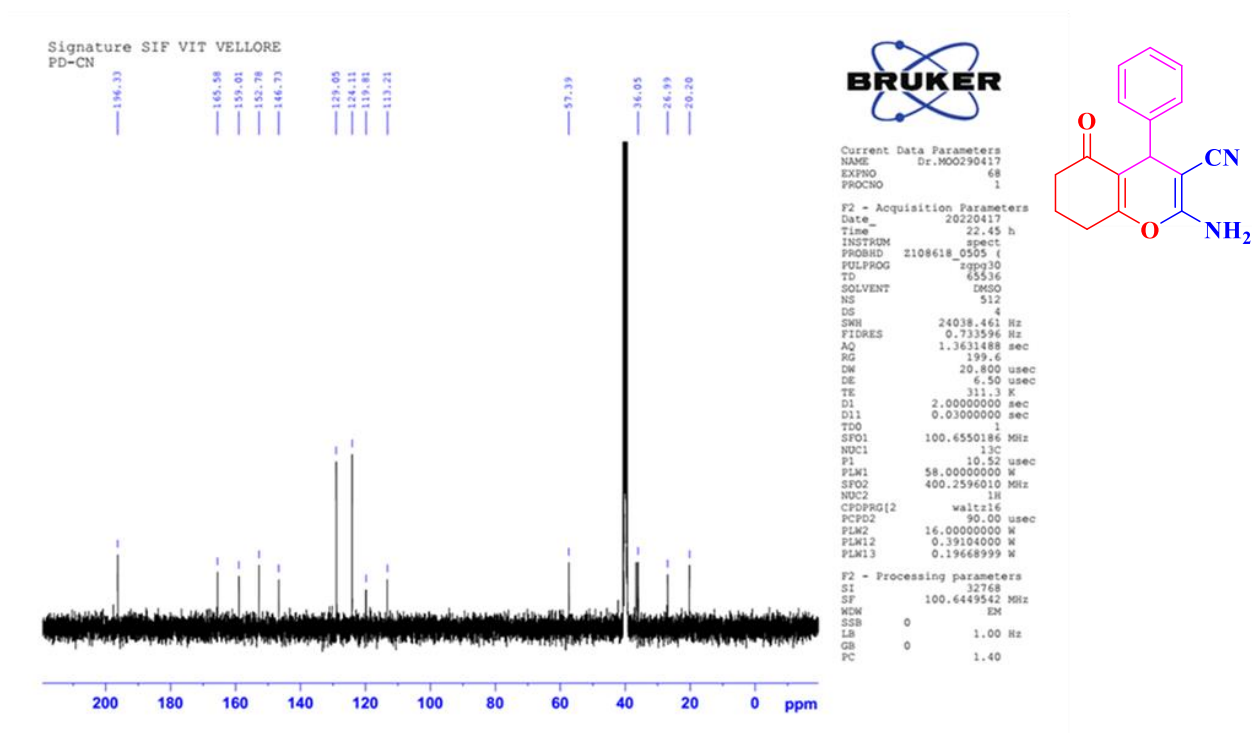Figure S3.  $^{13}\text{C}$  NMR spectrum of 1.4a.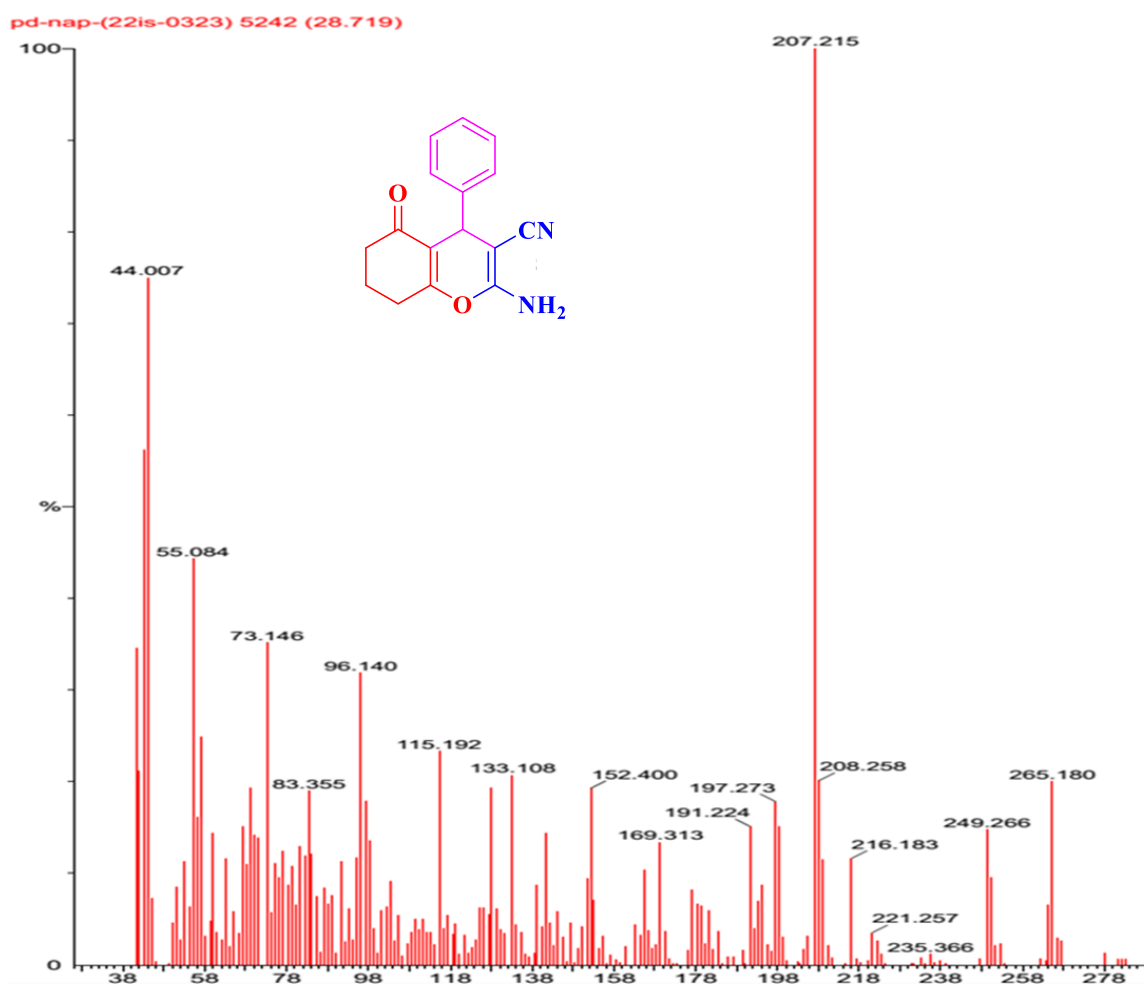

Figure S4. GC-MS spectrum of 1.4a.

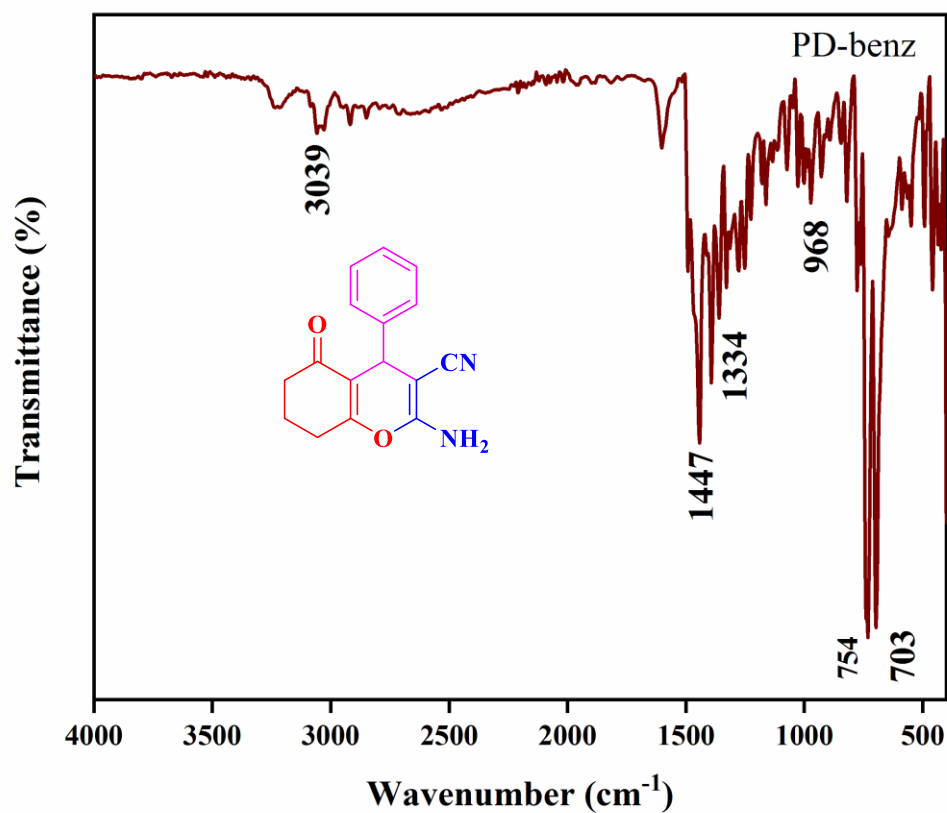

Figure S5. IR spectrum of 1.4a.

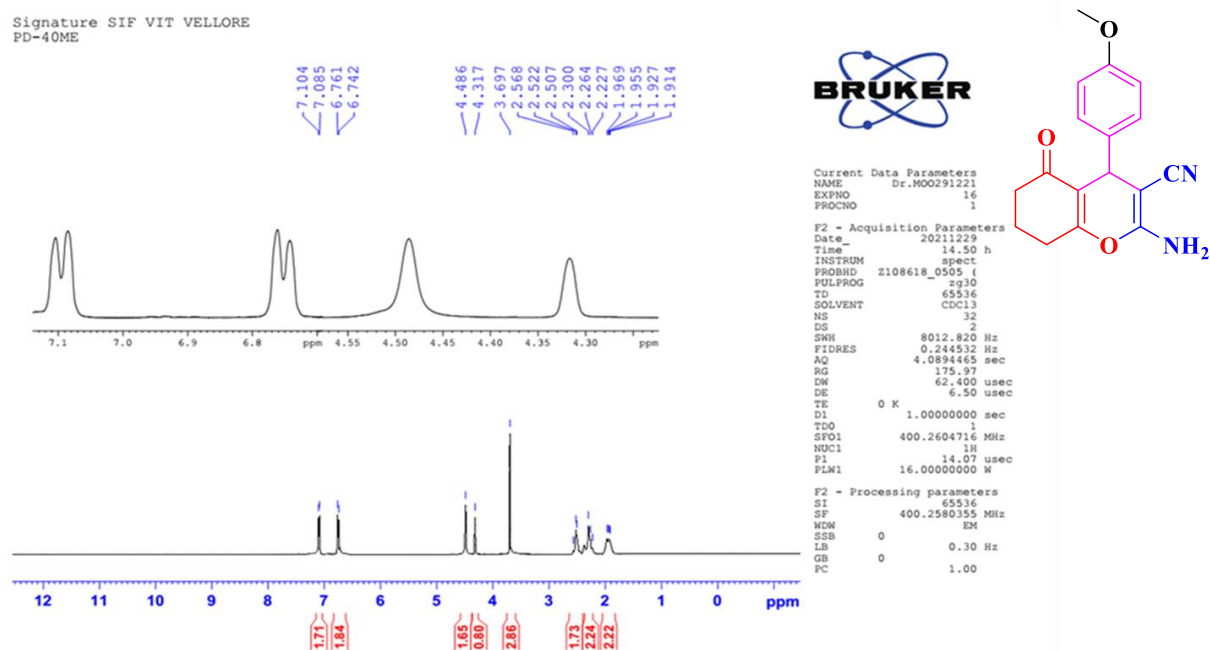Figure S6. <sup>1</sup>H NMR spectrum of 1.4b.

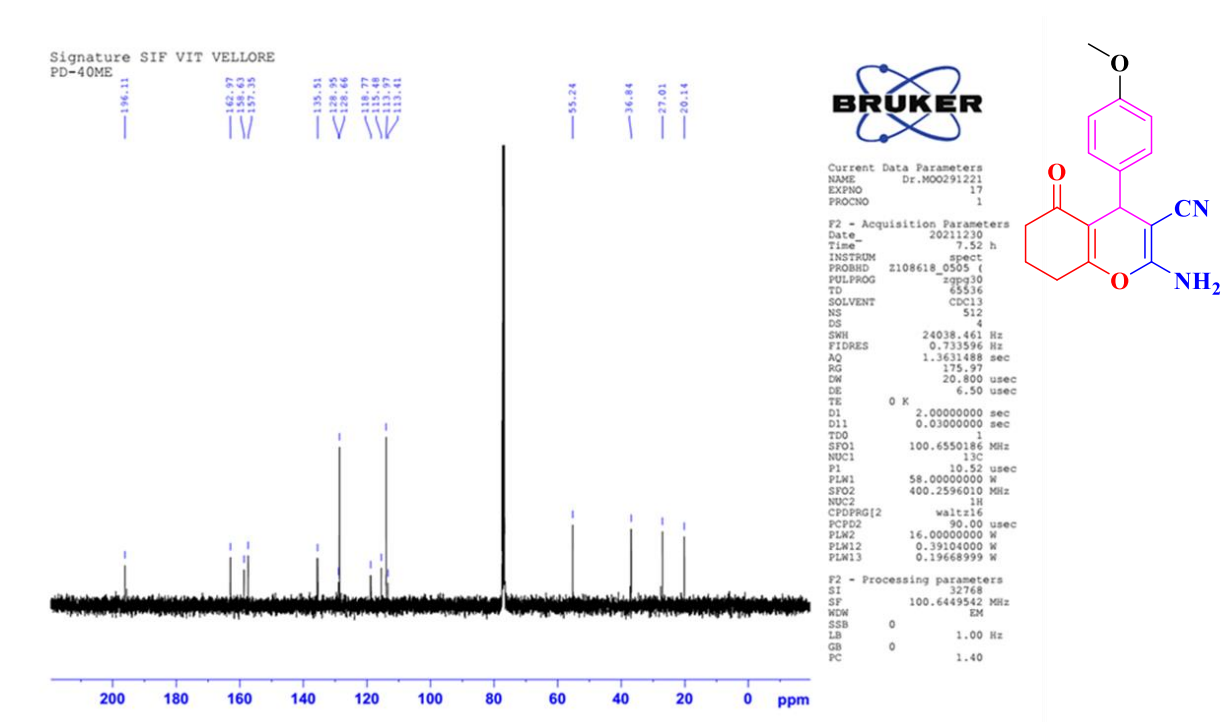Figure S7.  $^{13}\text{C}$  NMR spectrum of 1.4b.

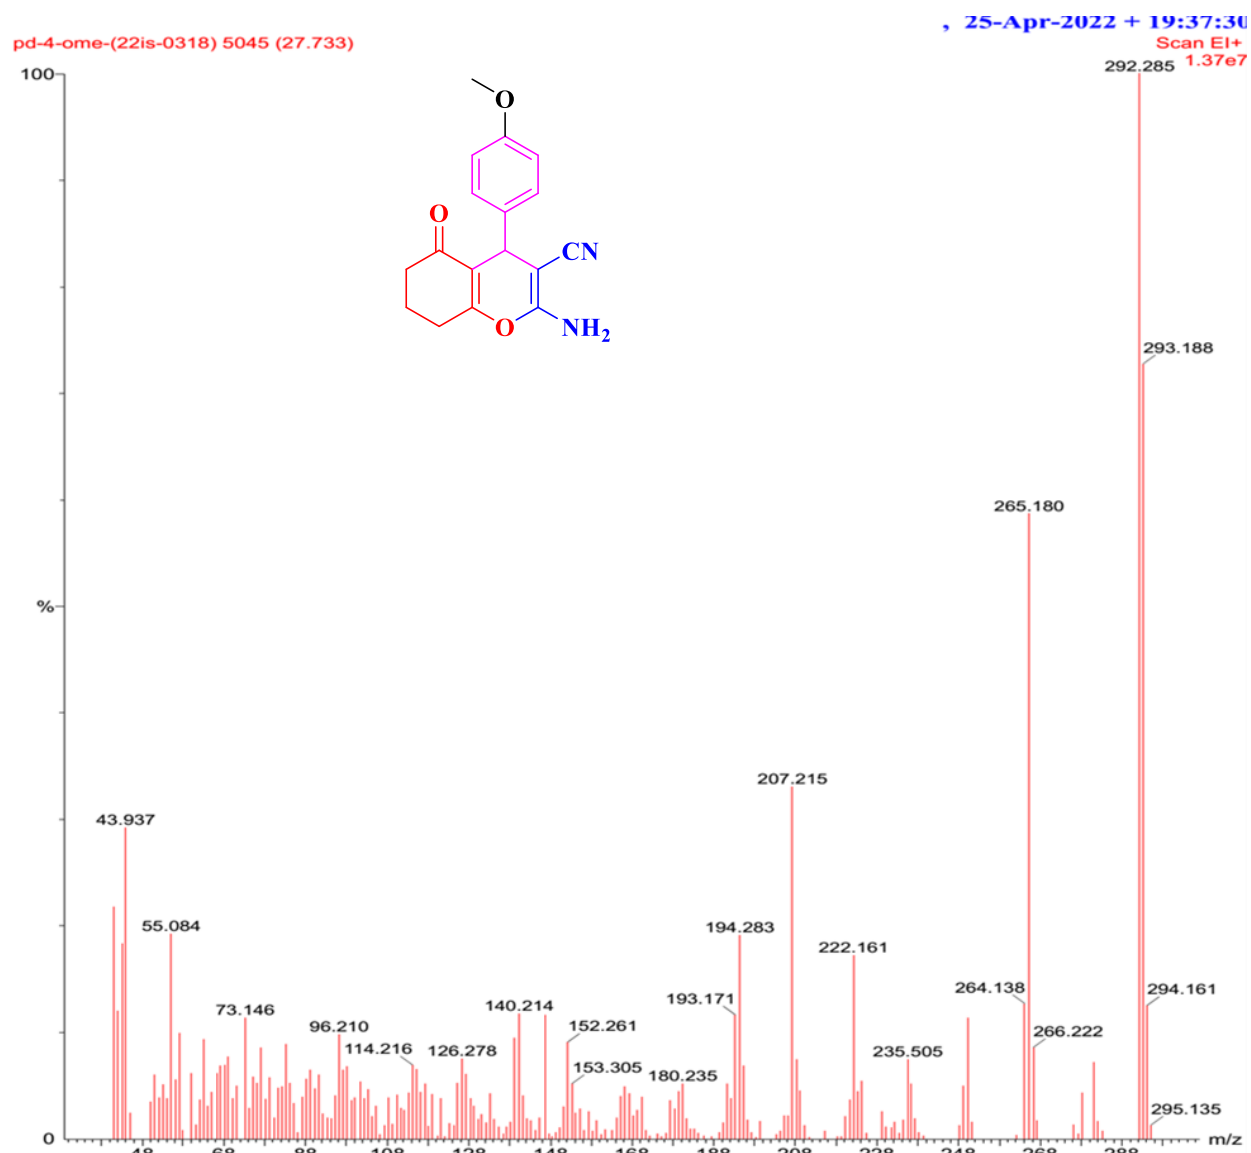

Figure S8. GC-MS spectrum of 1.4b.



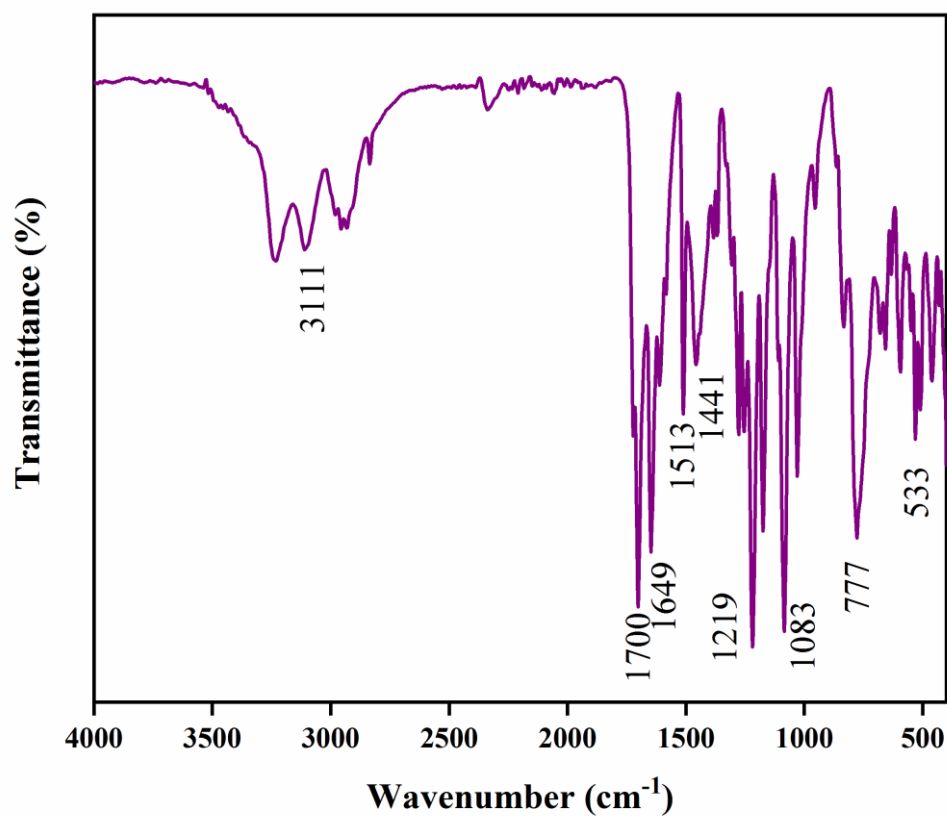

Figure S9. IR spectrum of 1.4b.

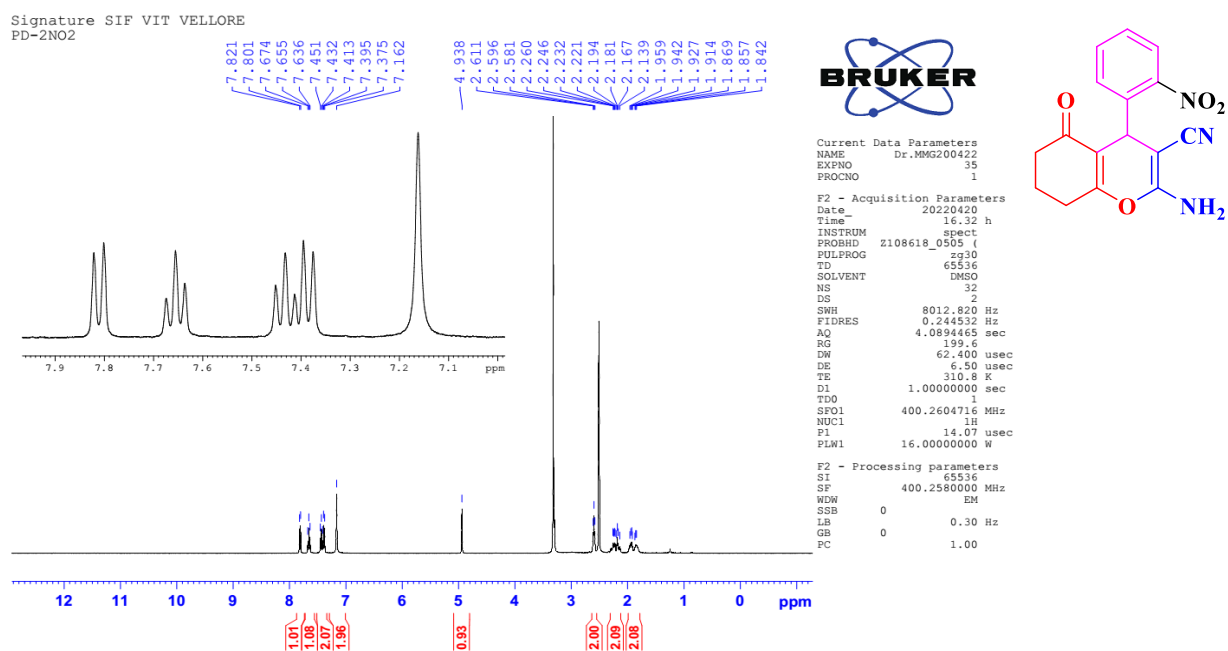Figure S10. <sup>1</sup>H NMR spectrum of 1.4c.

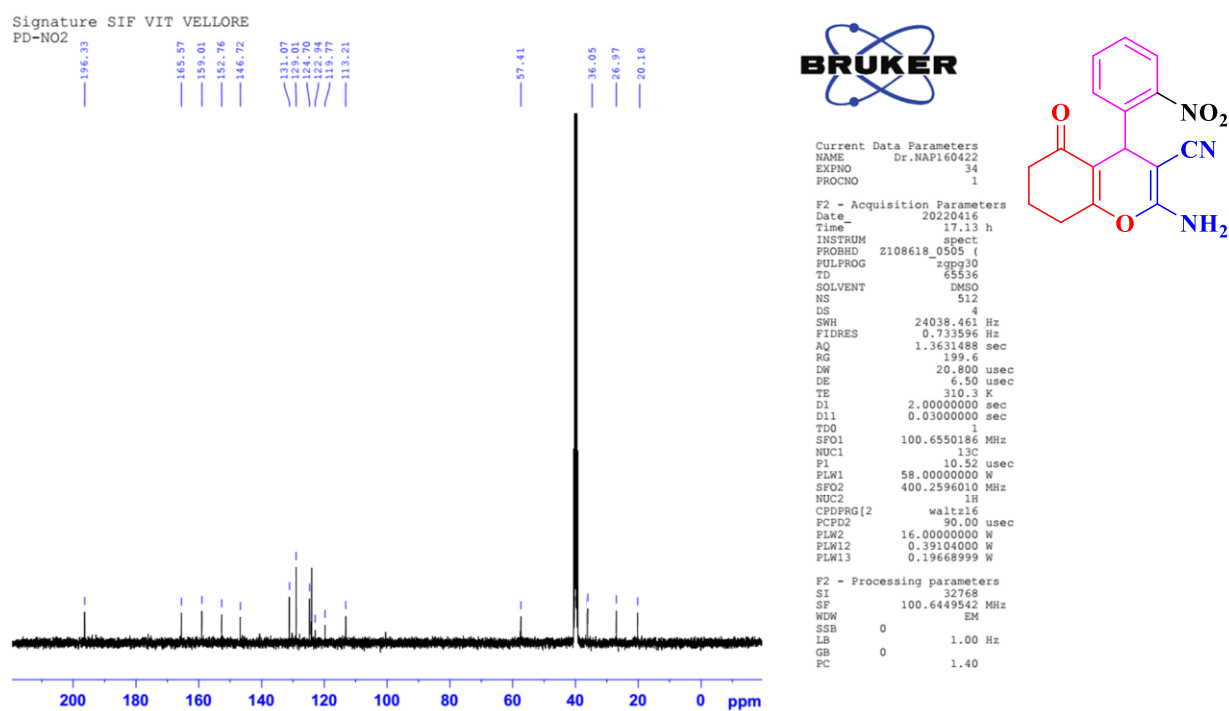Figure S11. <sup>13</sup>C NMR spectrum of 1.4c.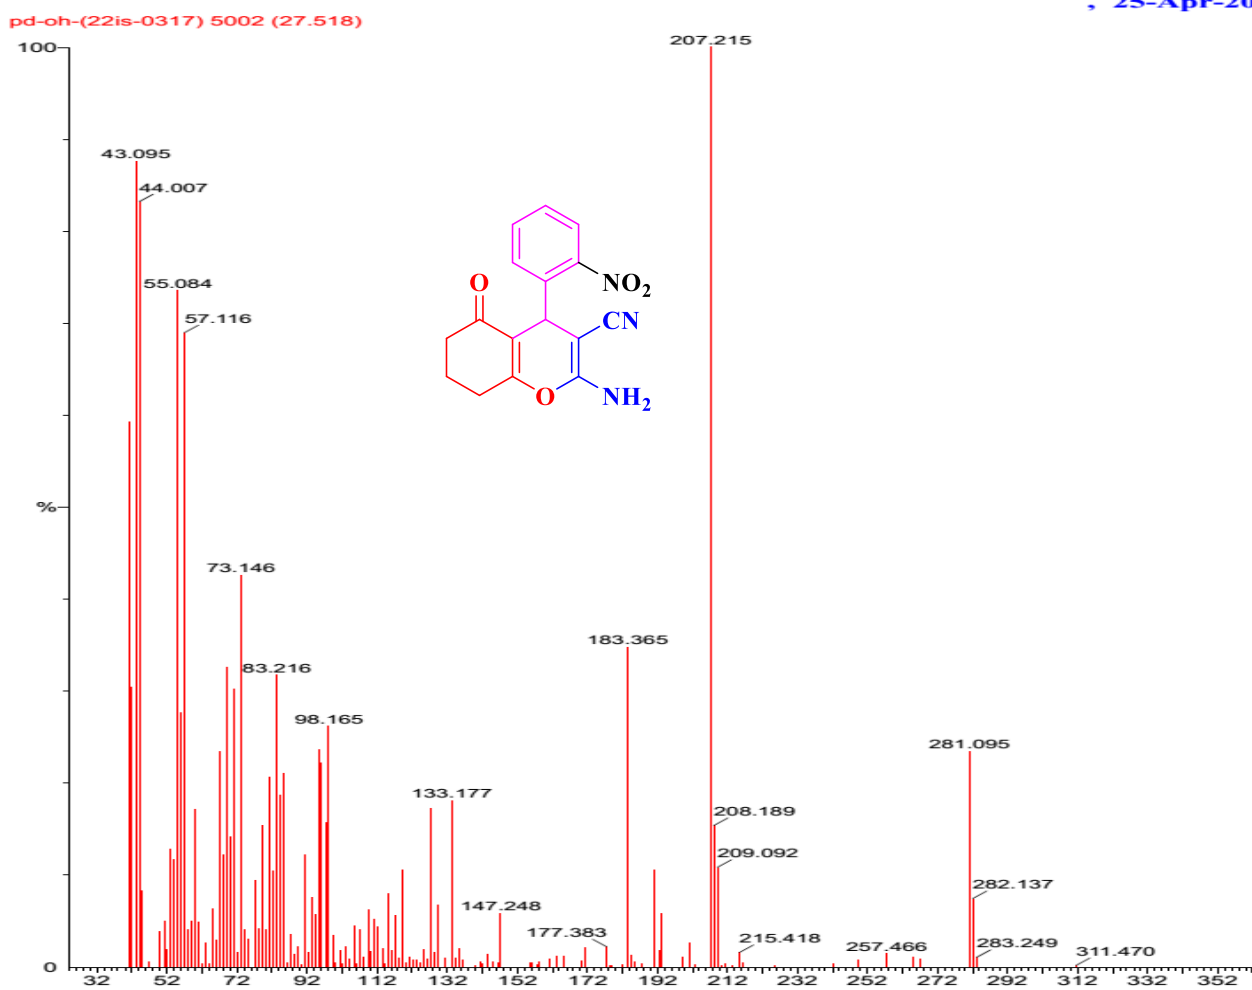

Figure S12. GC-MS spectrum of 1.4c.

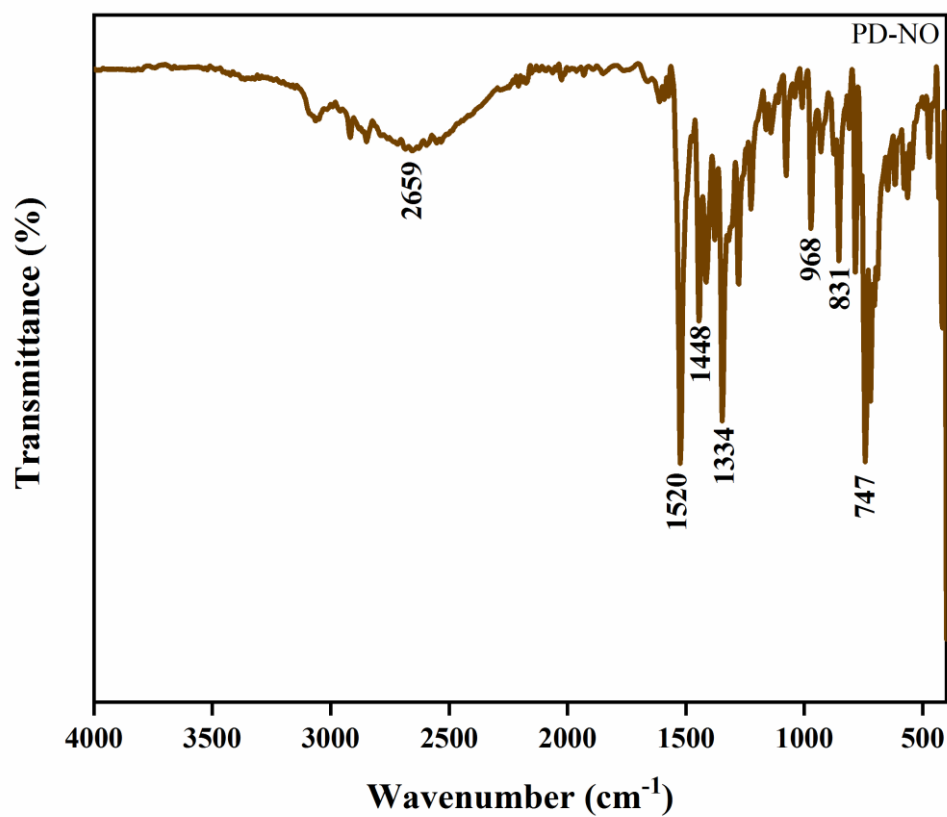

Figure S13. IR spectrum of 1.4c.

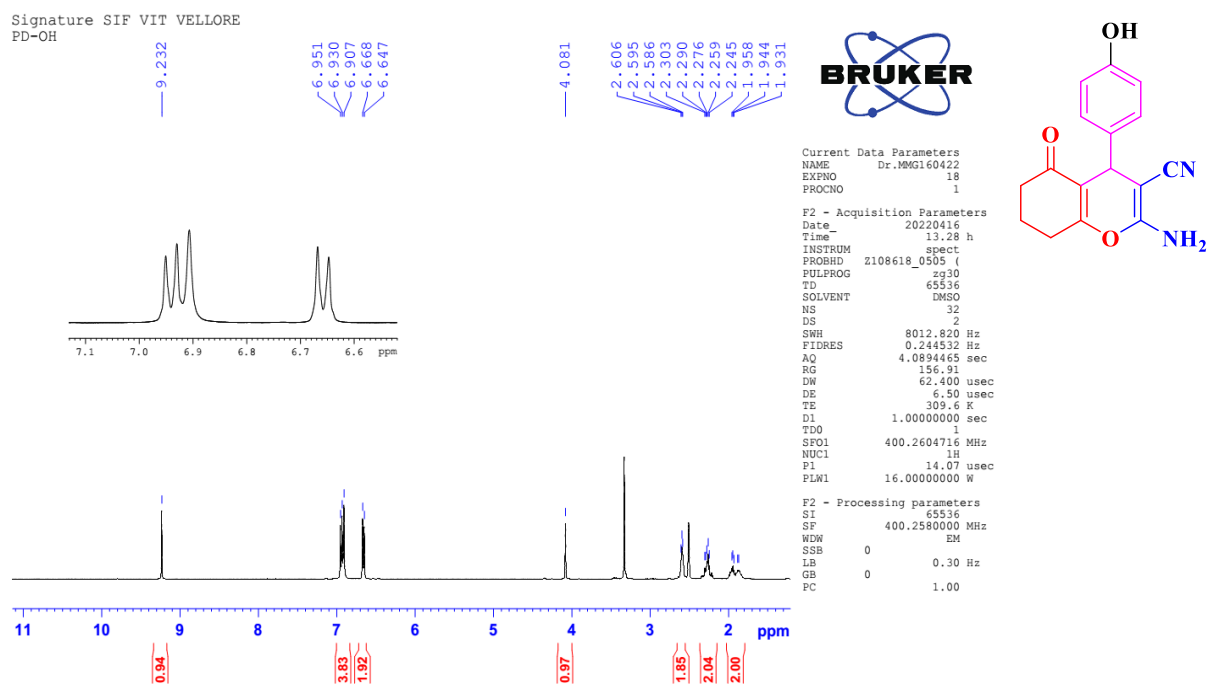Figure S14. <sup>1</sup>H NMR spectrum of 1.4d.

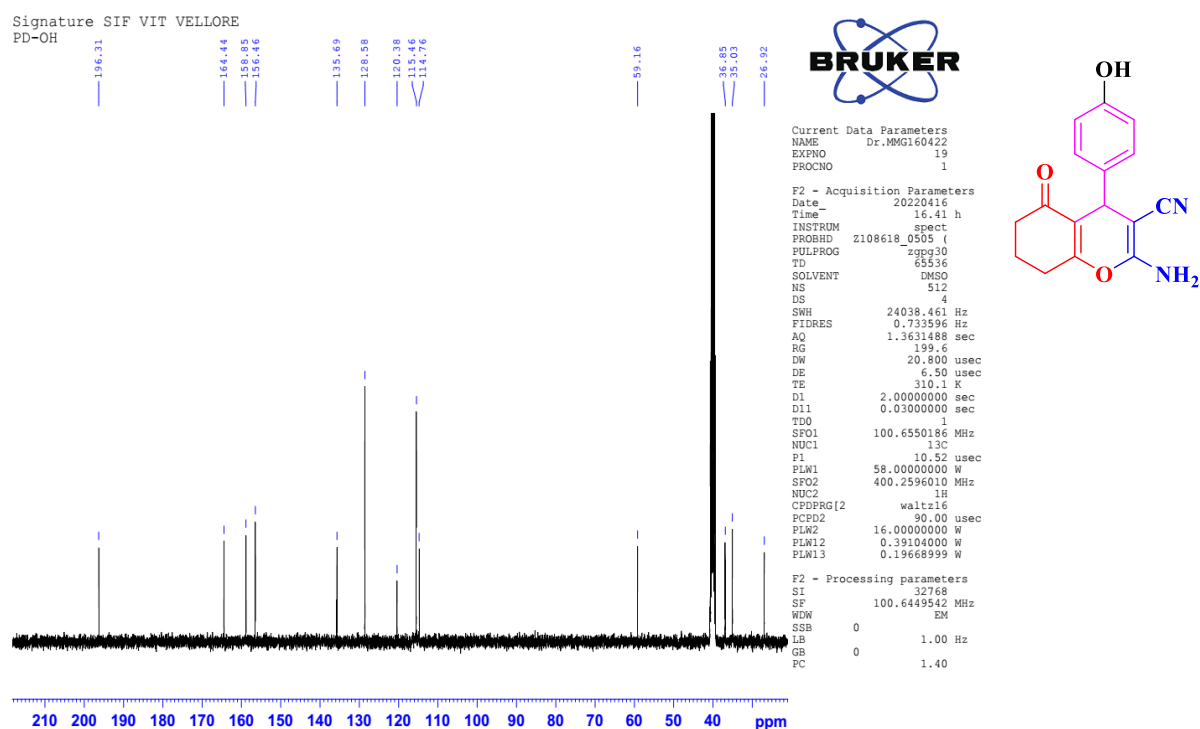Figure S15. <sup>13</sup>C NMR spectrum of 1.4d.

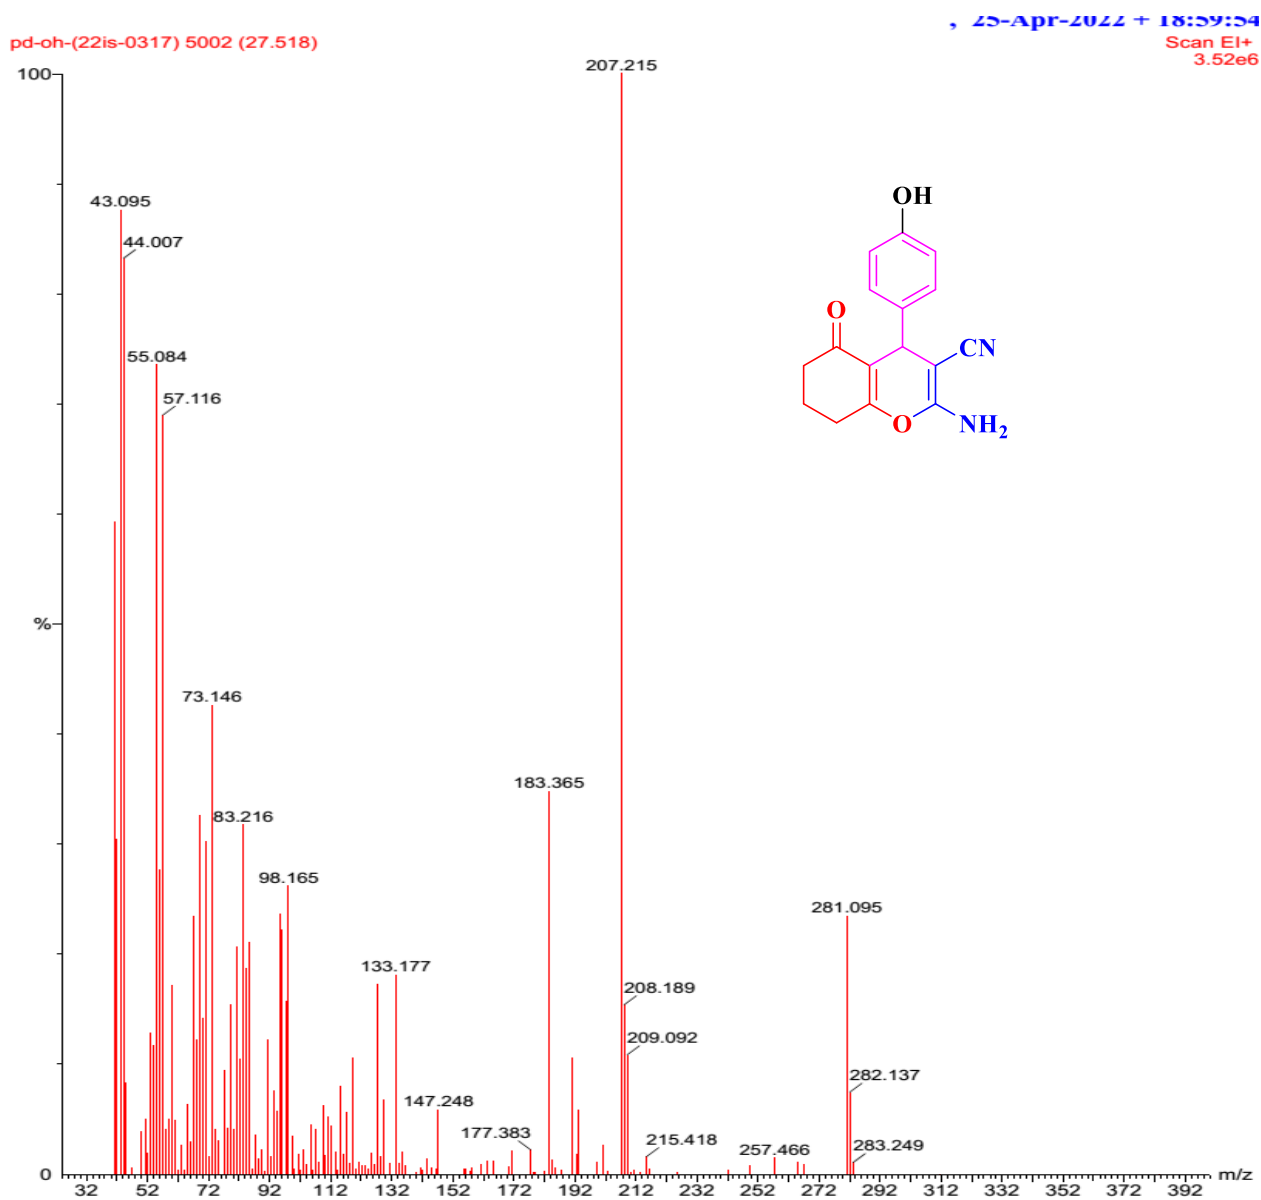

Figure S16. GC-MS spectrum of 1.4d.

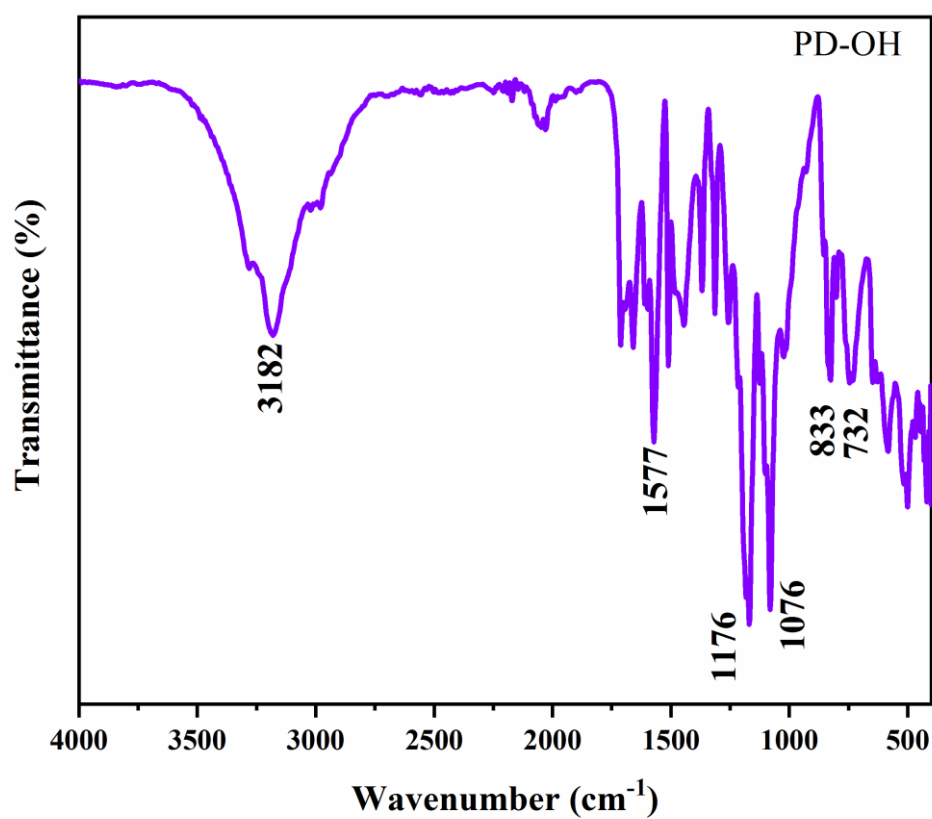

Figure S17. IR spectrum of 1.4d.

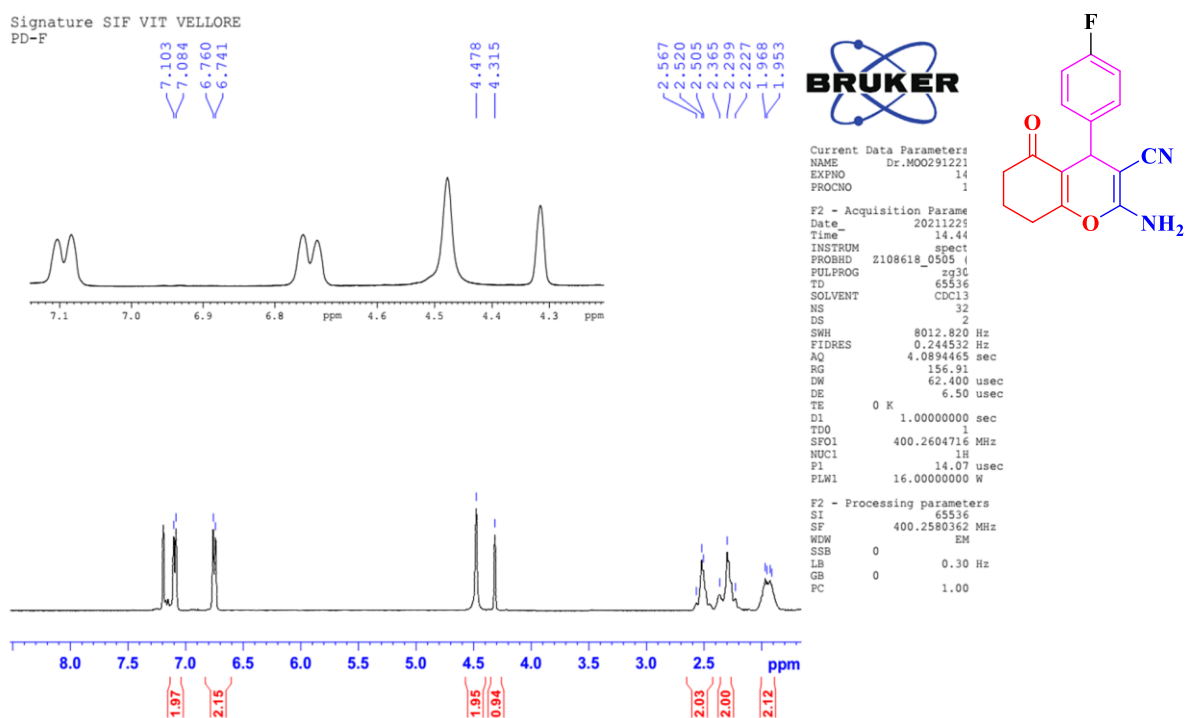Figure S18. <sup>1</sup>H NMR spectrum of 1.4e.

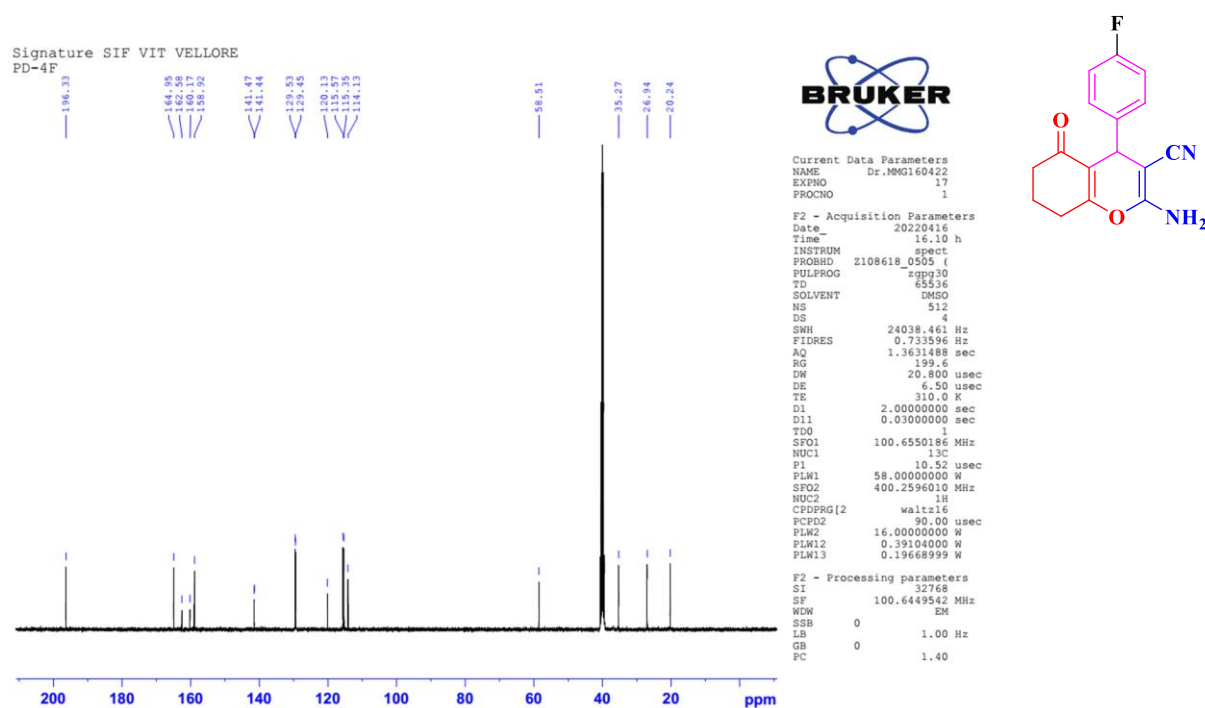Figure S19.  $^{13}\text{C}$  NMR spectrum of 1.4e.

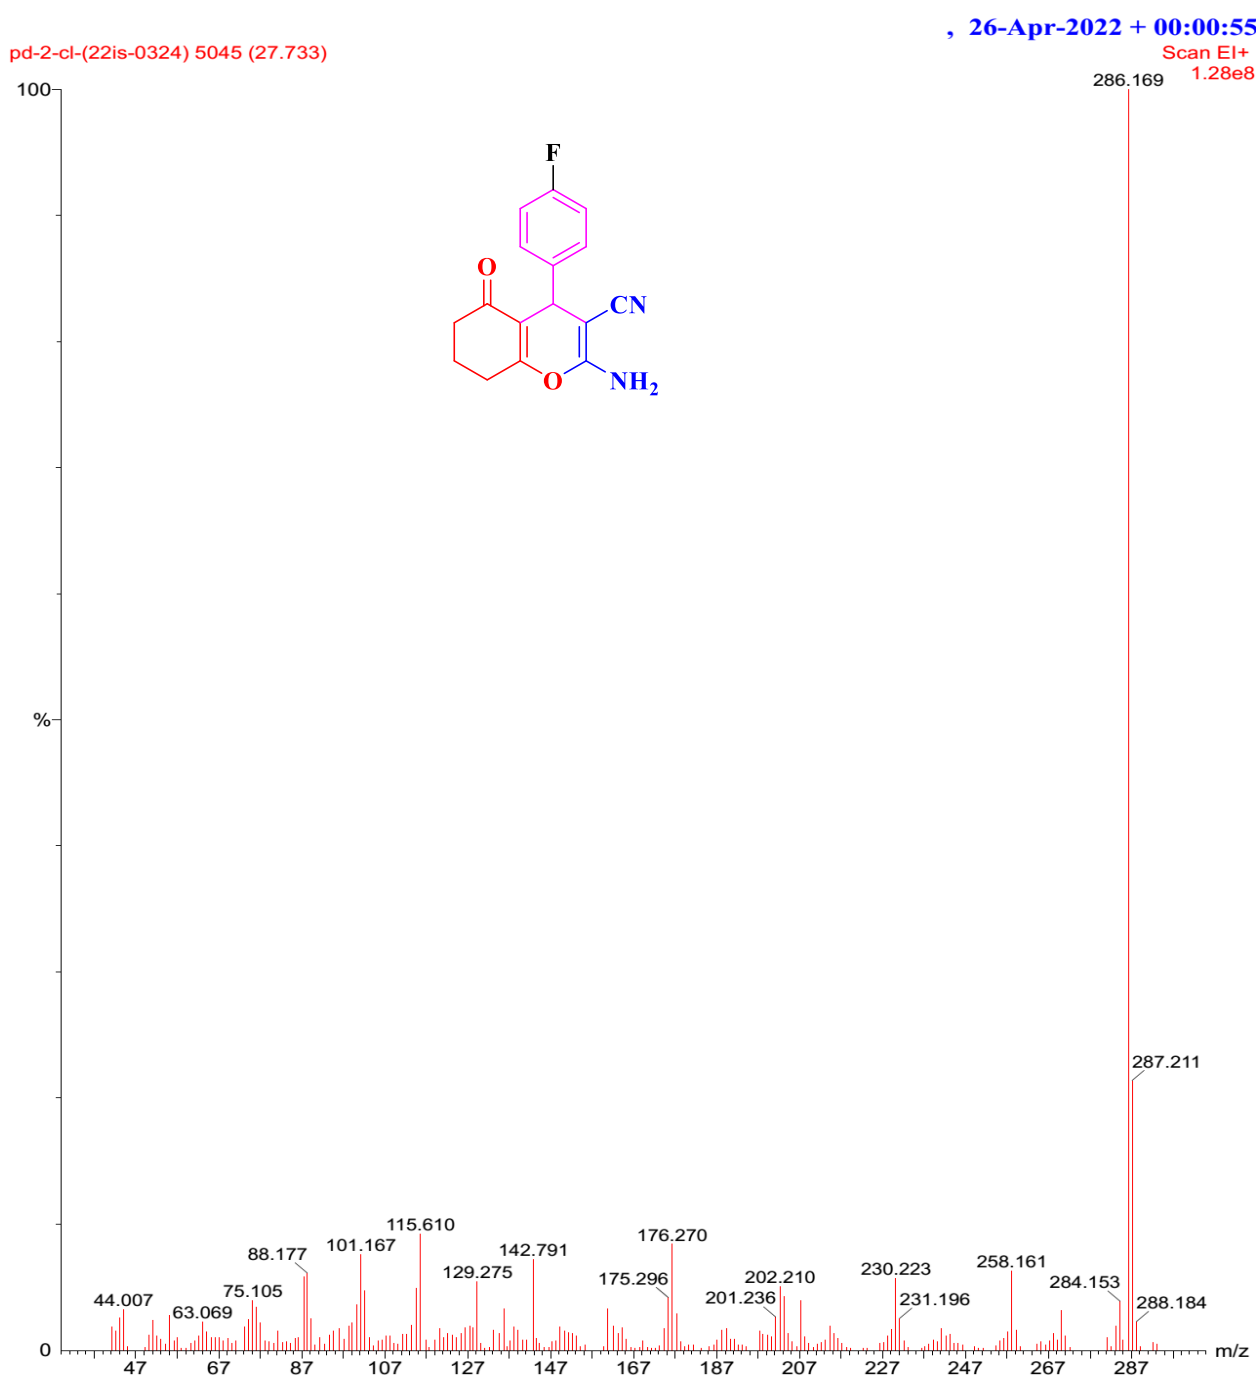

Figure S20. GC-MS spectrum of 1.4e.



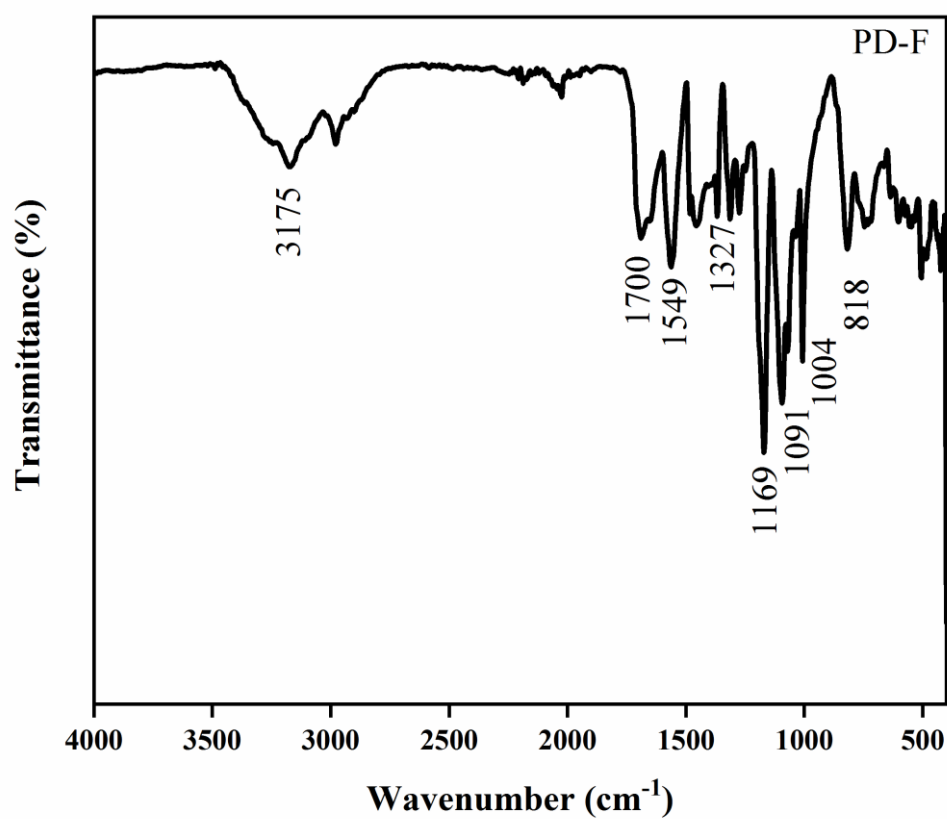

Figure S21. IR spectrum of 1.4e.

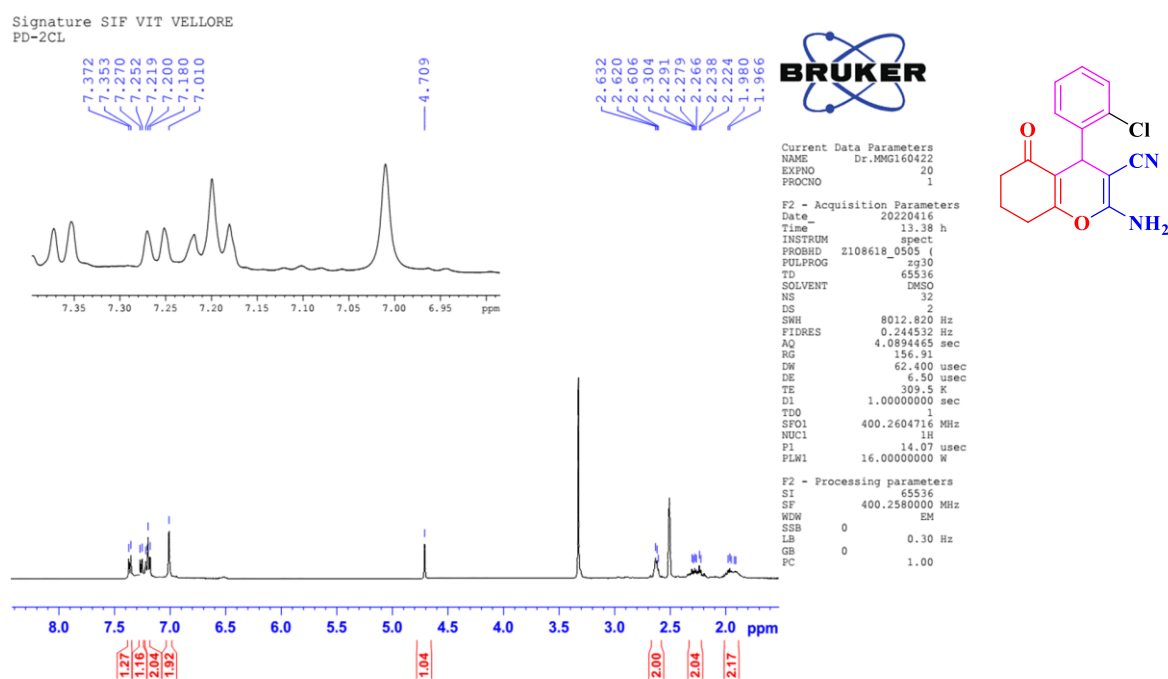Figure S22. <sup>1</sup>H NMR spectrum of 1.4f.

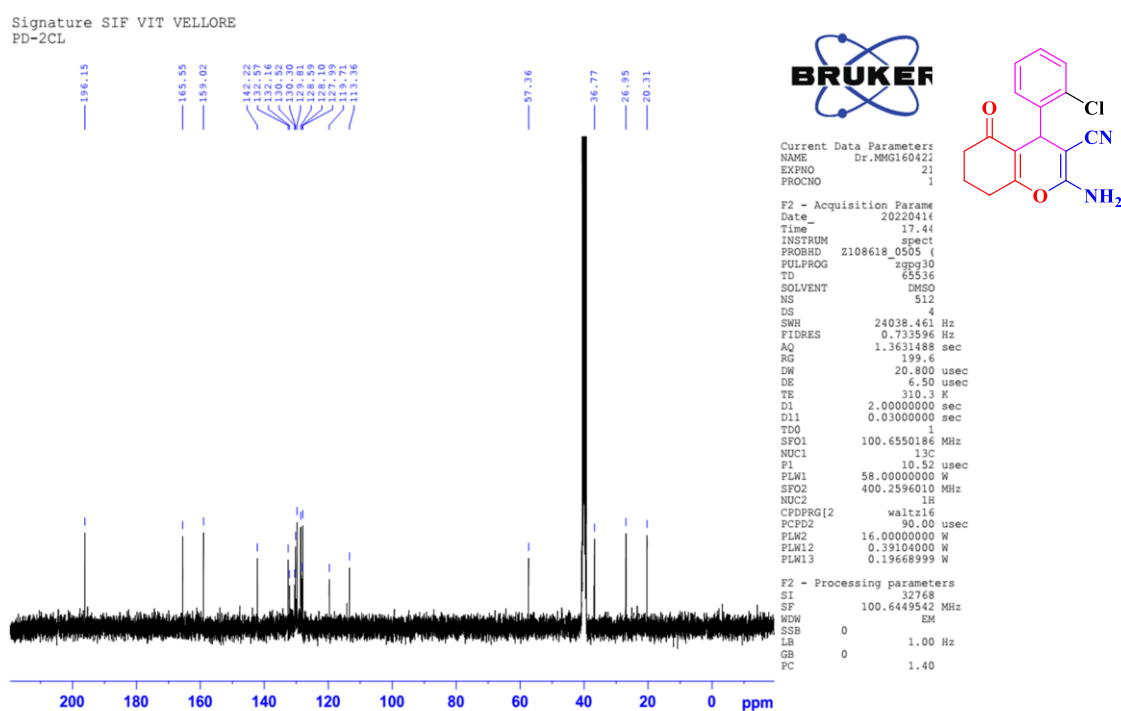Figure S23.  $^{13}\text{C}$  NMR spectrum of 1.4f.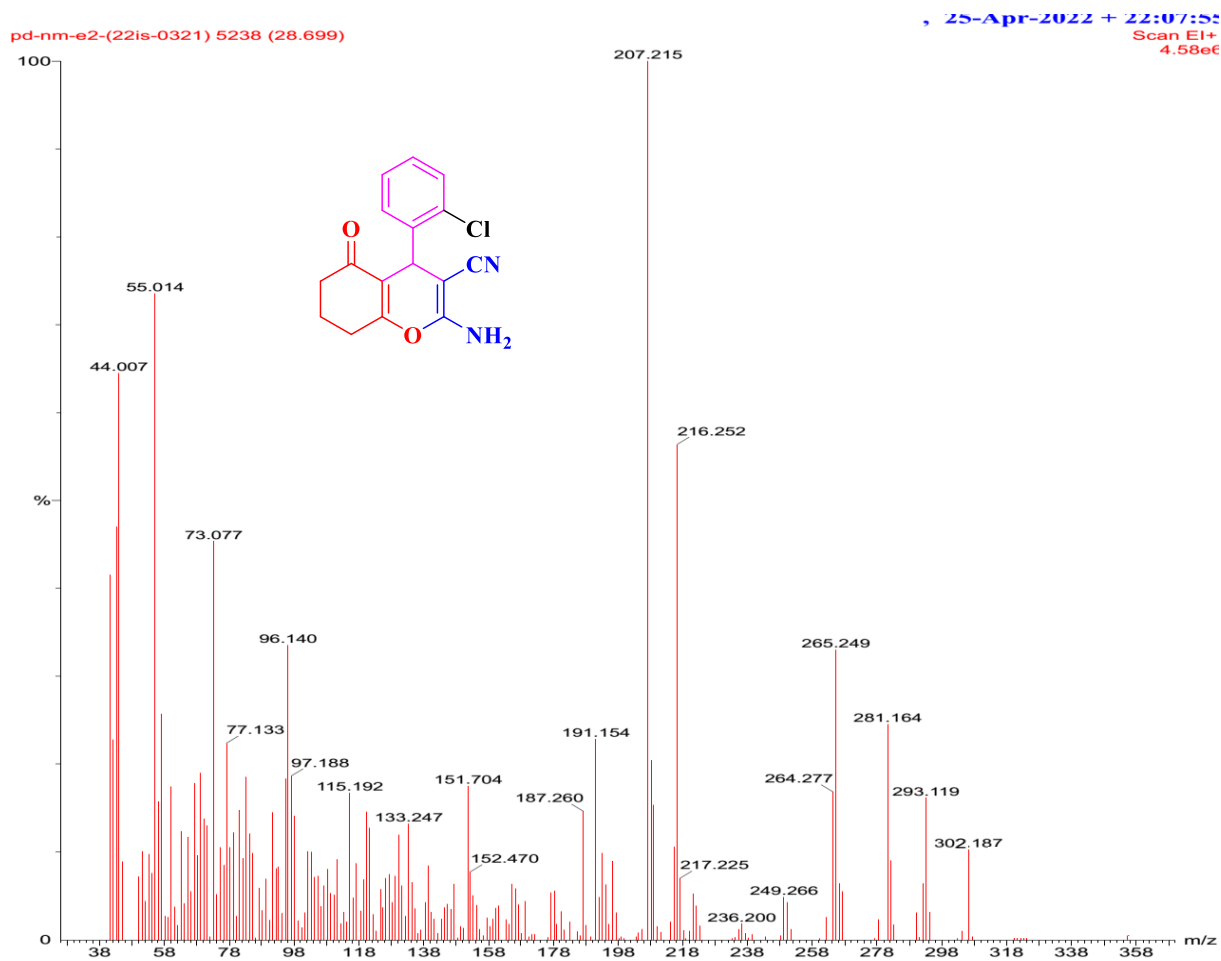

Figure S24. GC-MS spectrum of 1.4f.

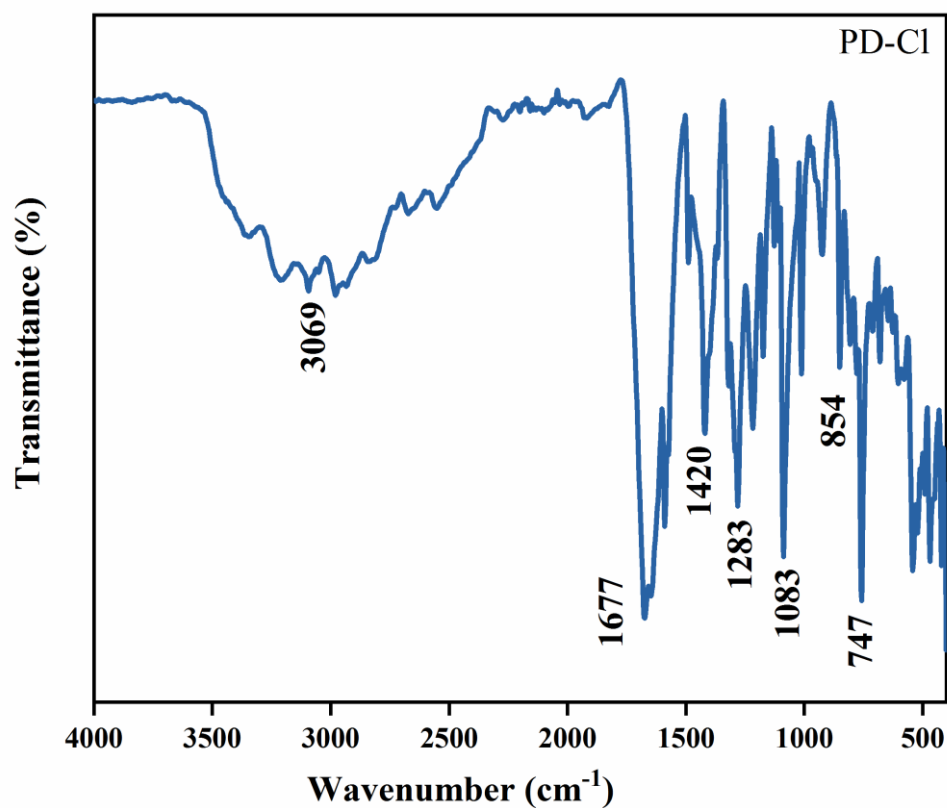

Figure S25. IR spectrum of 1.4f.

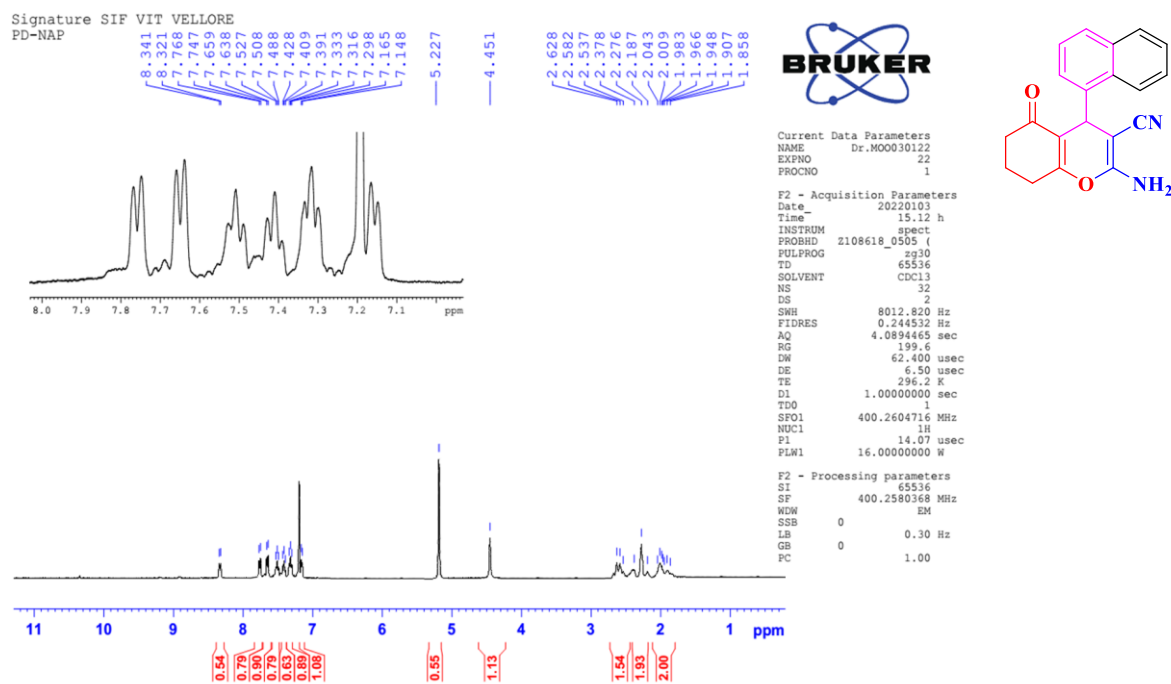Figure S26. <sup>1</sup>H NMR spectrum of 1.4g.

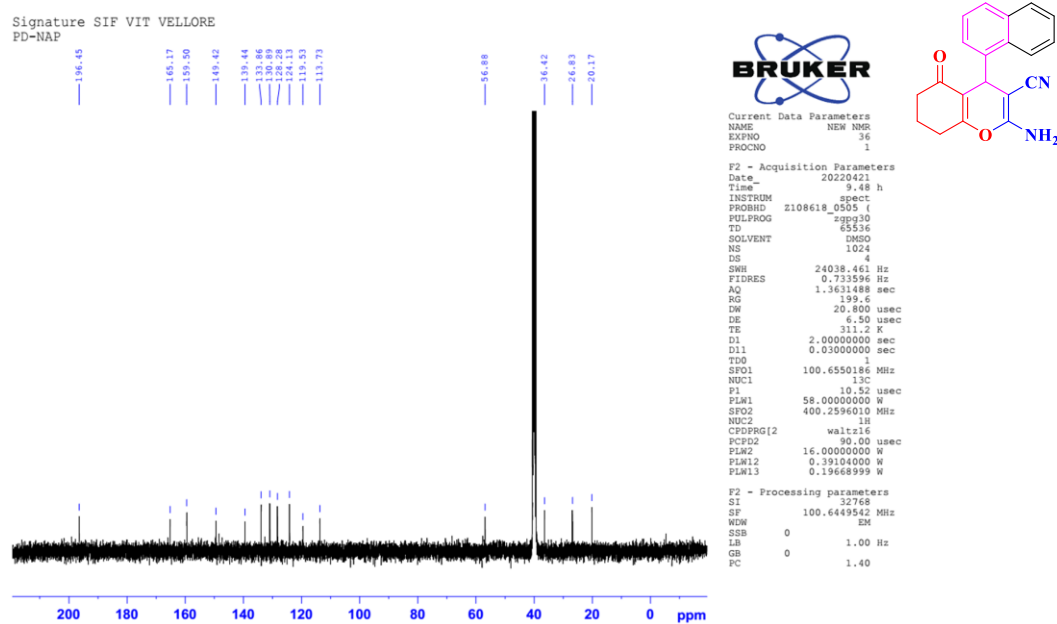Figure S27.  $^{13}\text{C}$  NMR spectrum of 1.4g.

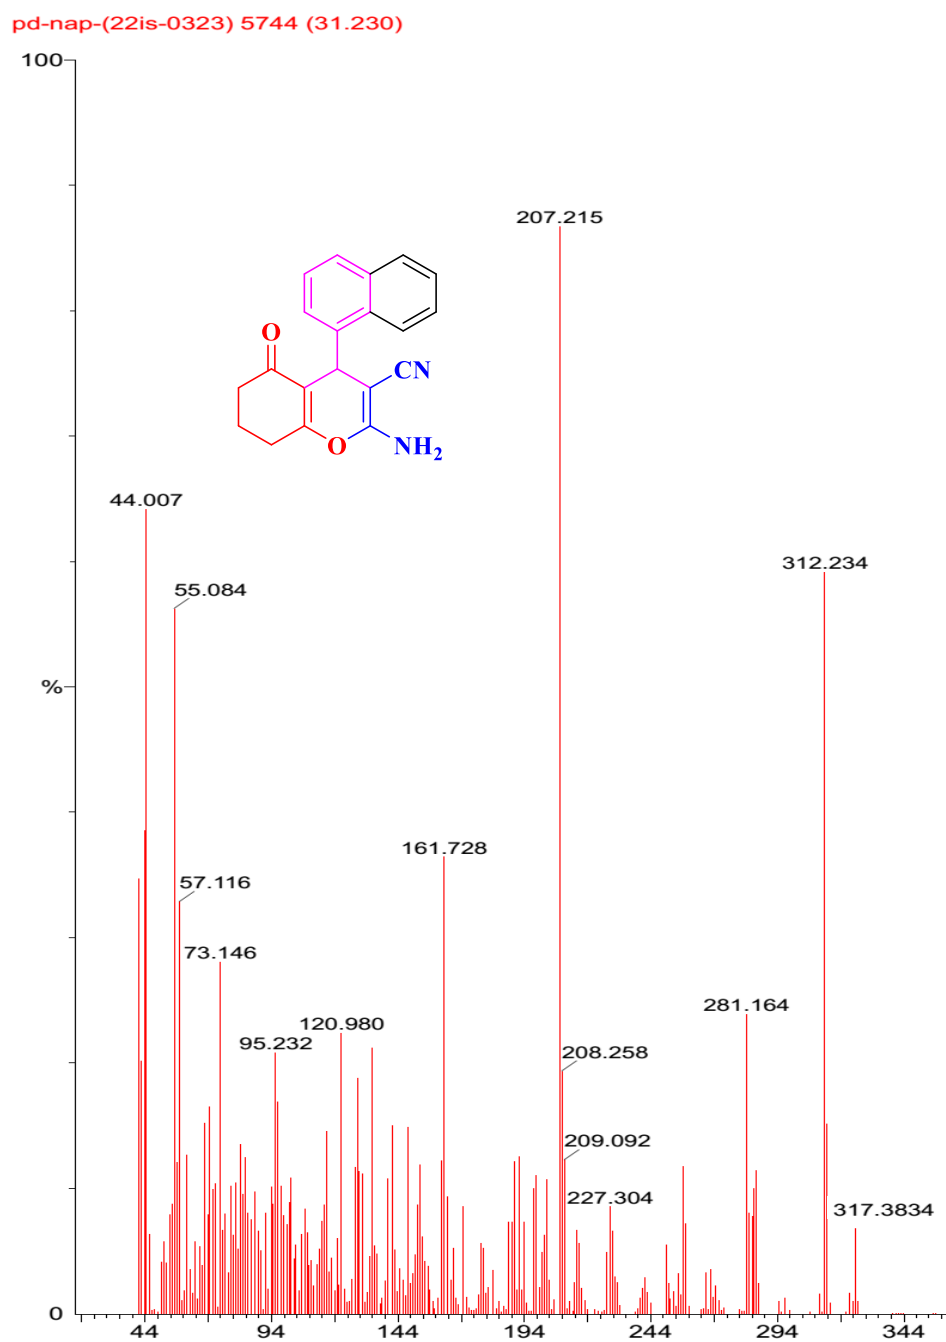

Figure S28. GC-MS spectrum of 1.4g.

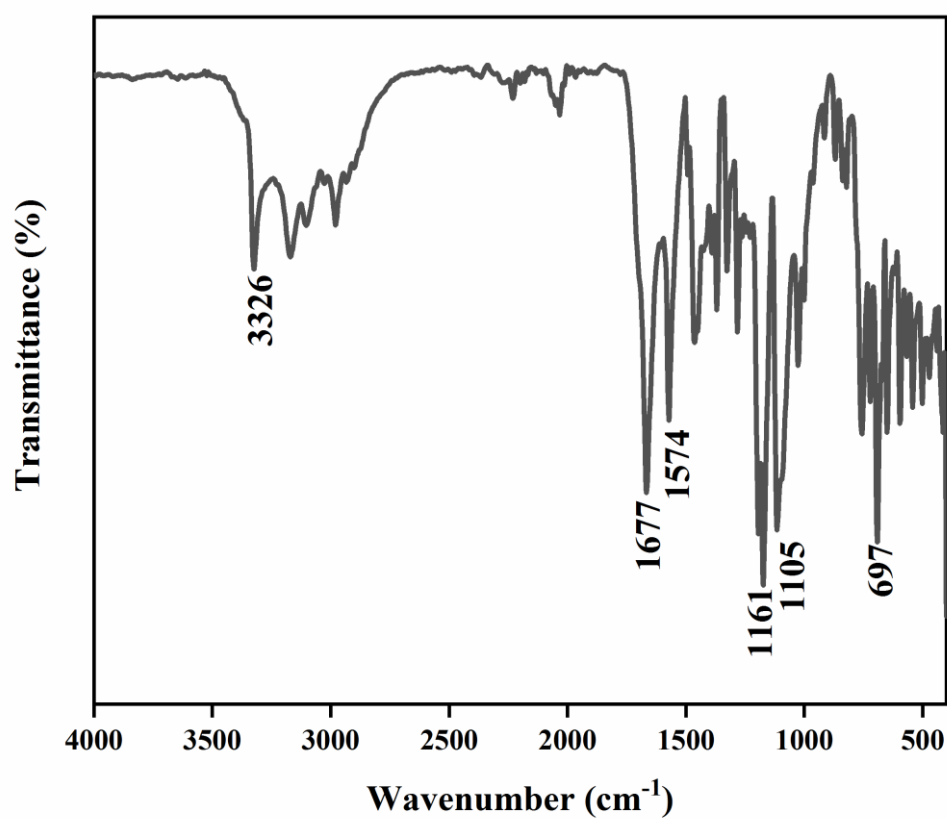

Figure S29. IR spectrum of 1.4g.

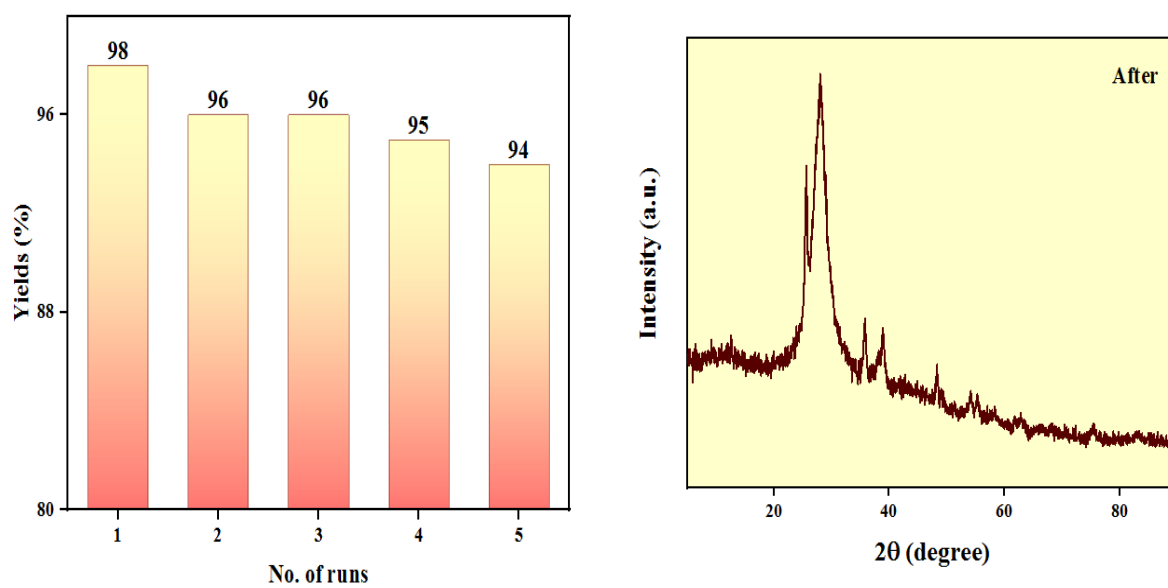

Figure S30. Reusability and reused XRD of 10% CN5CT nanocomposites.
